# Supplementary material
Source: PubMed Central journal article supplement (PMC3650991)
Supplement: NIHMS52197-supplement-2.pdf [file NIHMS52197-supplement-2.pdf]

**Supplementary Table 1. Mutational status of NSCLC cell lines.**

|                  | <i>KRAS</i> | <i>STK11</i> | <i>TP53</i> | <i>CDKN2A</i> | <b>OTHERS</b> |
|------------------|-------------|--------------|-------------|---------------|---------------|
| <b>NCI-H23</b>   | MUT (G12C)  | MUT          | MUT         | WT            |               |
| <b>NCI-H2122</b> | MUT (G12C)  | MUT          | MUT         | MUT           | CDH1          |
| <b>NCI-H1734</b> | MUT (G13C)  | MUT          | MUT         | WT            | RB1           |
| <b>NCI-H460</b>  | MUT (Q61H)  | MUT          | WT          | MUT           | PIK3CA        |
| <b>A549</b>      | MUT (G12S)  | MUT          | WT          | MUT           |               |
| <b>A427</b>      | MUT (G12D)  | MUT          | WT          | MUT           | CTNNB1        |
| <b>NCI-H727</b>  | MUT (G12V)  | WT           | MUT         | WT            |               |
| <b>H441</b>      | MUT (G12V)  | WT           | MUT         | WT            |               |
| <b>NCI-H1792</b> | MUT (G12C)  | WT           | MUT         | WT            |               |
| <b>SK-LU-1</b>   | MUT (G12D)  | WT           | MUT         | MUT           |               |
| <b>NCI-H358</b>  | MUT (G12D)  | WT           | WT          | WT            |               |
| <b>CALU-1</b>    | MUT (G12C)  | WT           | WT          | WT            |               |
| <b>H1171</b>     | MUT (G12C)  | nd           | nd          | nd            |               |
| <b>NCI-H322M</b> | WT          | WT           | MUT         | MUT           |               |
| <b>NCI-H520</b>  | WT          | WT           | MUT         | MUT           |               |
| <b>NCI-H2170</b> | WT          | WT           | MUT         | MUT           |               |
| <b>HOP92</b>     | WT          | WT           | MUT         | MUT           | NF1           |
| <b>SK-MES-1</b>  | WT          | WT           | MUT         | MUT           |               |
| <b>EKVX</b>      | WT          | WT           | MUT         | WT            |               |
| <b>NCI-H522</b>  | WT          | WT           | MUT         | WT            |               |
| <b>NCI-H510A</b> | WT          | WT           | MUT         | WT            |               |
| <b>NCI-H226</b>  | WT          | WT           | WT          | MUT           |               |
| <b>HCC78</b>     | WT          | nd           | nd          | nd            |               |
| <b>HCC95</b>     | WT          | nd           | nd          | nd            |               |
| <b>LUDLU-1</b>   | WT          | nd           | nd          | nd            |               |
