# Supplementary material
Source: PubMed Central journal article supplement (PMC3650991)
Supplement: NIHMS52197-supplement-3.pdf [file NIHMS52197-supplement-3.pdf]

**SUPPLEMENTARY FIGURE LEGENDS****Supplementary Table 1. Mutational status of twenty-five NSCLC cell lines.**

*KRAS* mutational status of the cell lines in the panel used in this study together with additional genetic mutation information derived from the Cancer Genome Project (<http://www.sanger.ac.uk/genetics/CGP/CellLines/>). MUT: mutant, WT: wild-type and nd: not determined.

**Figure S1. Single agent drug effects in twenty-five NSCLC cell lines.**

(A) Selected drugs that show a statistically significant reduction of cell viability in *KRAS* mutant cells versus wild-type cells. Panels show curves representing average values for each *KRAS* genotype (mean  $\pm$  SEM).

(B) Selected drugs that show no differential effect when comparing reduction of cell viability in *KRAS* mutant cells versus wild-type cells. Panels show curves representing average values for each *KRAS* genotype (mean  $\pm$  SEM).

(C) Heat-map displaying hierarchical cluster analysis of relative drug sensitivities across the cell panel. Clustering of RAF, MEK and IGF1R inhibitors is highlighted.

**Figure S2. Effects of MEK inhibitors on signal transduction pathways in NSCLC cell lines.**

*KRAS* mutant and *KRAS* wild-type cells were treated for 4 h or 24 h with 100 nM PD-0325901 and cell lysates were probed with the indicated antibodies.

**Figure S3. Effects of IGF1R inhibitors on signal transduction pathways in NSCLC cell lines.**

(A) *KRAS* mutant and *KRAS* wild-type cells were treated for 4 h or 24 h with 1  $\mu$ M NVP-AEW541 and cell lysates were probed with the indicated antibodies.

(B) Levels of phospho-/total AKT in six *KRAS* mutant and six *KRAS* wild-type NSCLC cell lines treated with an AKT inhibitor (5  $\mu$ M Akti1/2) or a PI3K

inhibitor (1  $\mu$ M GDC0941) for 4 h. Data was normalized to vehicle-treated cells.

**Figure S4. Effects of combining MEK and IGF1R inhibitors on signal transduction pathways in NSCLC cell lines.**

*KRAS* mutant and *KRAS* wild-type cells were treated for 4 h with either 1  $\mu$  M NVP-AEW541, 10nM PD-0325901, or both together, and cell lysates were probed with the indicated antibodies.

**Figure S5. Effects of combining MEK and IGF1R inhibitors on cell viability and apoptosis in NSCLC cell lines.**

(A-B) Representative cell lines of each *KRAS* genotype treated for 72 h with serial dilutions of IGF1R inhibitor NVP-AEW541 together with a low dose of MEK inhibitor (5 nM or 20nM PD-0325901). Relative cell viability (A) and apoptosis (B) were measured. The Chou-Talalay Combination Index (CI) measure, with values less than 1 indicating drug synergy (1), was calculated for all three *KRAS* mutant cell lines using a fixed dose ratio of the two drugs. Insufficient response of the *KRAS* wild-type cells produces no CI value (n.d.).

**Figure S6. Drug combinations across the NSCLC cell line panel.**

(A) IC<sub>60</sub> values of NSCLC cell lines treated for 72 h with serial dilutions of IGF1R inhibitor NVP-AEW541 together with a low dose of MEK inhibitor (5 nM PD-0325901).

(B) *KRAS* mutant and *KRAS* wild-type NSCLC cells were treated for 72 h with serial dilutions of IGF1R inhibitor NVP-AEW541 together with a low dose of MEK inhibitor (1 nM Trametinib). Curves represent average values for each *KRAS* genotype (mean  $\pm$  SEM).

(C-D) *KRAS* mutant and *KRAS* wild-type NSCLC cells were treated for 72 h with serial dilutions of IGF1R inhibitor OSI-906 together with low doses of MEK (C) or RAF (D) inhibitor (5 nM PD-0325901 or 100 nM AZ628). Curves represent average values for each *KRAS* genotype (mean  $\pm$  SEM). Right-hand panel of S6C shows single data-points representing viability of individual

cell lines at two representative doses of IGF1R inhibitor in the presence or absence of MEK inhibitor PD-0325901.

(E) IC<sub>60</sub> values of NSCLC cell lines treated for 72 h with serial dilutions of IGF1R inhibitor OSI-906 together with low a dose of MEK inhibitor (5 nM PD-0325901).

(F) *KRAS* mutant and *KRAS* wild-type NSCLC cells were treated for 72 h with serial dilutions of IGF1R inhibitor OSI-906 together with a low dose of MEK inhibitor (1 nM Trametinib). Curves represent average values for each *KRAS* genotype (mean ± SEM).

(G) Six *KRAS* mutant (MUT) and six *KRAS* wild-type (WT) NSCLC cell lines were treated with IGF1R and/or MEK inhibitors for 12 days. Viability was measured by crystal violet staining.

(H) IC<sub>60</sub> values of NSCLC cell lines treated for 72 h with serial dilutions of PI3K inhibitor GDC0941 together with a low dose of MEK inhibitor (5 nM PD-0325901).

(I) *KRAS* mutant and *KRAS* wild-type NSCLC cells were treated for 72 h with serial dilutions of PI3K inhibitor GDC0941 together with a low dose of MEK inhibitor (90 nM Selumetinib). Curves represent average values for each *KRAS* genotype (mean ± SEM).

**Figure S7. Indicators of IGF1R or INSR depletion in NSCLC cell lines and of combination drug treatment in *Kras*<sup>LA2-G12D</sup> mice.**

(A) Six *KRAS* mutant and four *KRAS* wild-type NSCLC cell lines were transfected with IGF1R, INSR or control siRNAs for 48 h and cell lysates were probed with the indicated antibodies.

(B) Individual lung tumors from *Kras*<sup>LA2-G12D/+</sup> mice, treated with either vehicle or the MEK inhibitor/IGF1R inhibitor combination for 40 d, were isolated at the conclusion of the experiment and cell lysates were probed with the indicated antibodies.

**Figure S8. Indicators of IGF1R pathway activity in NSCLC cell lines.**

(A) Six *KRAS* mutant and six *KRAS* wild-type NSCLC cell lines growing at steady-state were deprived of serum for 24 h and then stimulated with either 20 ng/ml IGF1 or 20 ng/ml EGF for 30 min. 10% indicates steady-state cells (10% FBS) for comparison. Cell lysates were probed with the indicated antibodies.

(B) Six *KRAS* mutant and six *KRAS* wild-type NSCLC cell lines growing at steady-state were treated for 4 h with either 1  $\mu$ M NVP-AEW541 or 1  $\mu$ M erlotinib and cell lysates were probed with the indicated antibodies.

(C) Cell lysates from six *KRAS* mutant and six *KRAS* wild-type cells growing at steady-state were probed with the indicated antibodies in order to compare protein expression levels between the two genotypes.

(D) Oncomine (<https://www.oncomine.com/resource/>) was used to extract gene expression data from publically available datasets (2, 3). Data derived from lung cancer cell lines was analysed for expression of IRS1 by comparing *KRAS* mutant versus *KRAS* wild-type cells following exclusion of cell lines carrying *EGFR* mutations. Panels show single data-points representing relative IRS1 expression in individual cell lines as measured on probe set 204686\_at.

(E) Oncomine (<https://www.oncomine.com/resource/>) was used to extract gene expression data from publically available datasets (2-4). Data derived from lung cancer cell lines and lung adenocarcinoma tumor samples was analysed for expression of IGF1R, IRS1 and IRS2 by comparing *KRAS* mutant versus *KRAS* wild-type cells following exclusion of cell lines carrying *EGFR* mutations. p values derived from these comparisons across different probe sets are displayed.

**Figure S9. KRAS is required for both MEK/ERK and PI3K/AKT signaling in *KRAS* mutant NSCLC cells.**

(A) *KRAS* mutant and *KRAS* wild-type cell lines were transfected with *KRAS*, *KRAS*-OTP or control siRNAs for 48 h and cell lysates were probed with the indicated antibodies.

(B) *KRAS* mutant cell lines were transfected with *KRAS* or control siRNAs for 48 h. 24h after transfection cells were treated with either DMSO or 100 nM rapamycin. Cell lysates were probed with the indicated antibodies.

**Figure S10. Acute oncogenic RAS signaling in MCF10A epithelial cells.**

(A) MCF10A/ER:HRAS V12 cells were deprived of growth factors for 24 h and treated with vehicle or 100 nM 4-OHT for 0, 15, 30, 60, 120 or 240 min. Cell lysates were probed with the indicated antibodies.

(B) MCF10A/ER:KRAS V12 cells were deprived of growth factors for 24 h and treated with vehicle or 250 nM 4-OHT for 4 h following a 20 min pre-treatment with either DMSO (Ctrl), 1  $\mu$ M NVP-AEW541, 1  $\mu$ M OSI-906 or 5 nM PD-0325901. Cell lysates were probed with the indicated antibodies.

**SUPPLEMENTARY REFERENCES**

1. Chou TC, Talalay P. Quantitative analysis of dose-effect relationships: the combined effects of multiple drugs or enzyme inhibitors. *Advances in enzyme regulation* 1984; 22: 27-55.
2. Barretina J, Caponigro G, Stransky N, Venkatesan K, Margolin AA, Kim S, et al. The Cancer Cell Line Encyclopedia enables predictive modelling of anticancer drug sensitivity. *Nature* 2012; 483: 603-7.
3. Garnett MJ, Edelman EJ, Heidorn SJ, Greenman CD, Dastur A, Lau KW, et al. Systematic identification of genomic markers of drug sensitivity in cancer cells. *Nature* 2012; 483: 570-5.
4. Bild AH, Yao G, Chang JT, Wang Q, Potti A, Chasse D, et al. Oncogenic pathway signatures in human cancers as a guide to targeted therapies. *Nature* 2006; 439: 353-7.
