# Supplementary material
Source: PubMed Central journal article supplement (PMC3650991)

# Supplementary Figure S2

Effects of MEK inhibitors on signal transduction pathways in NSCLC cell lines

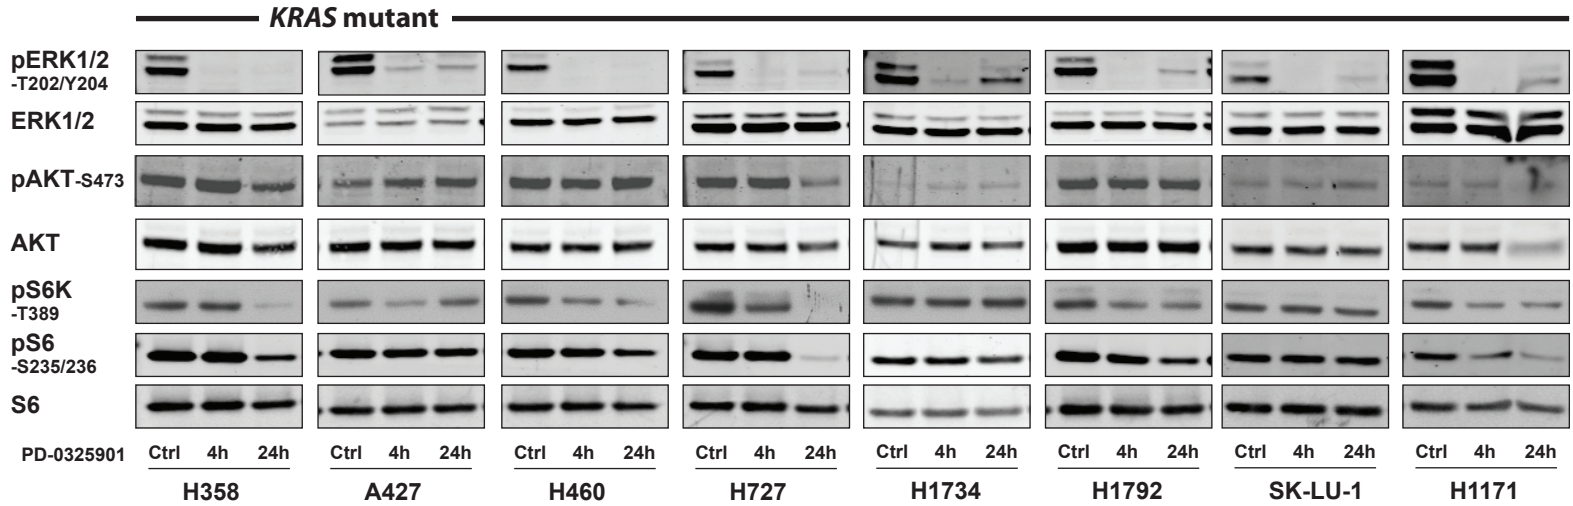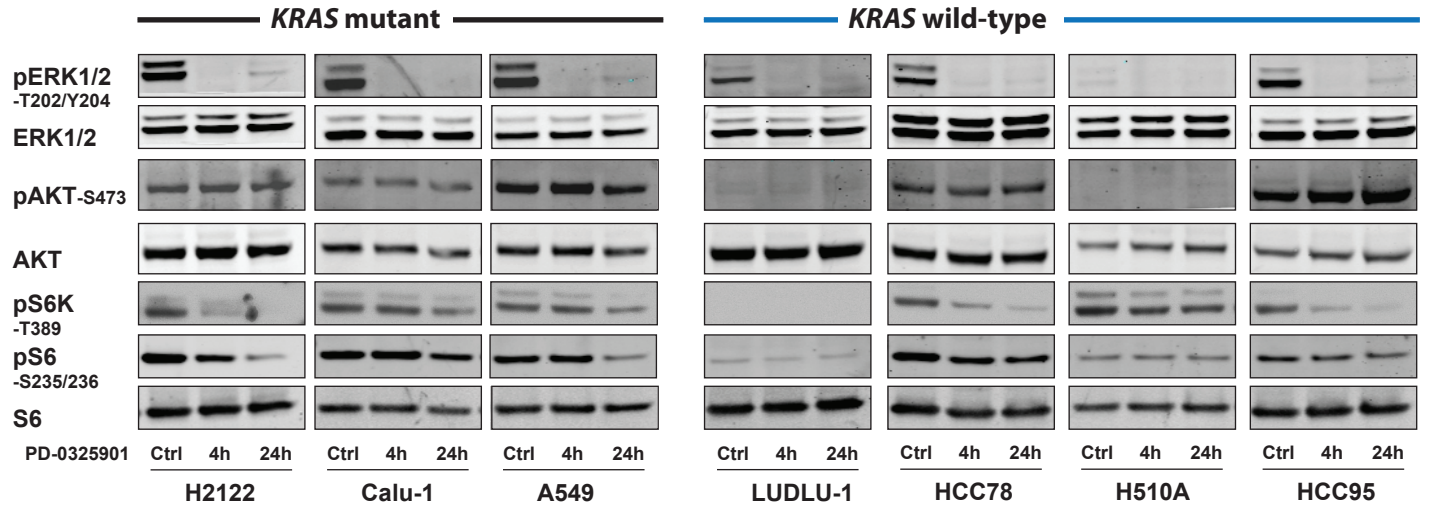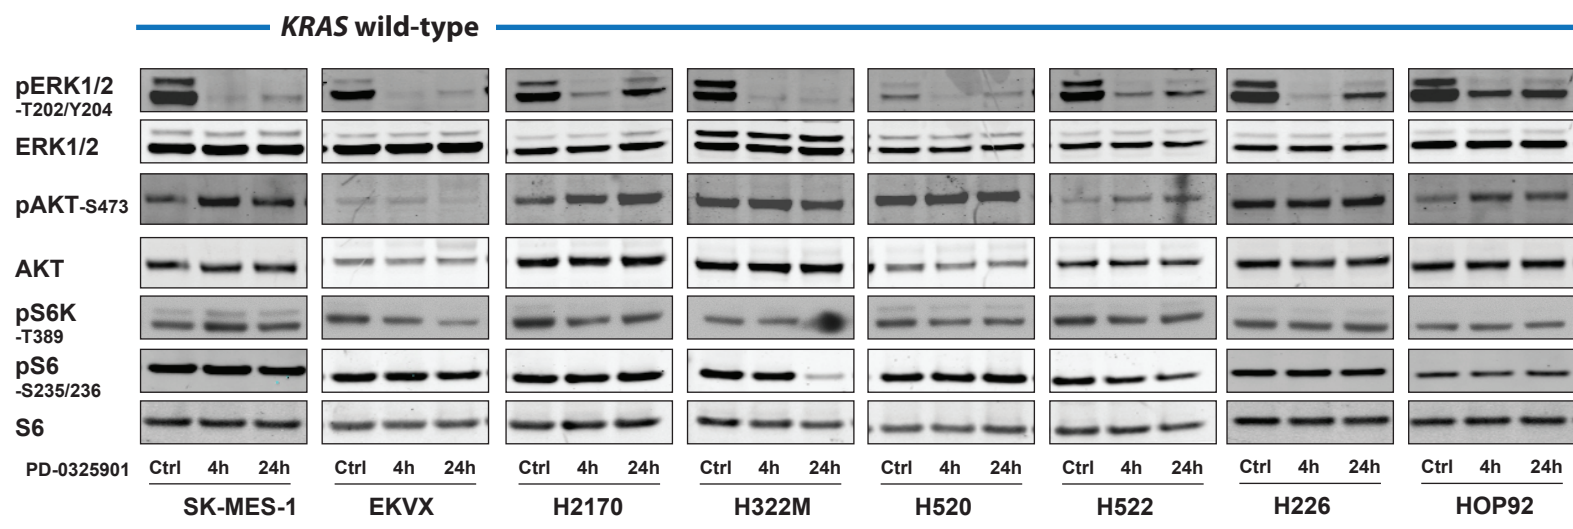

Supplement: NIHMS52197-supplement-5.pdf [file NIHMS52197-supplement-5.pdf]
