# Supplementary material
Source: PubMed Central journal article supplement (PMC3650991)

# Supplementary Figure S3

Effects of IGF1R inhibitors on signal transduction pathways in NSCLC cell lines

**A**

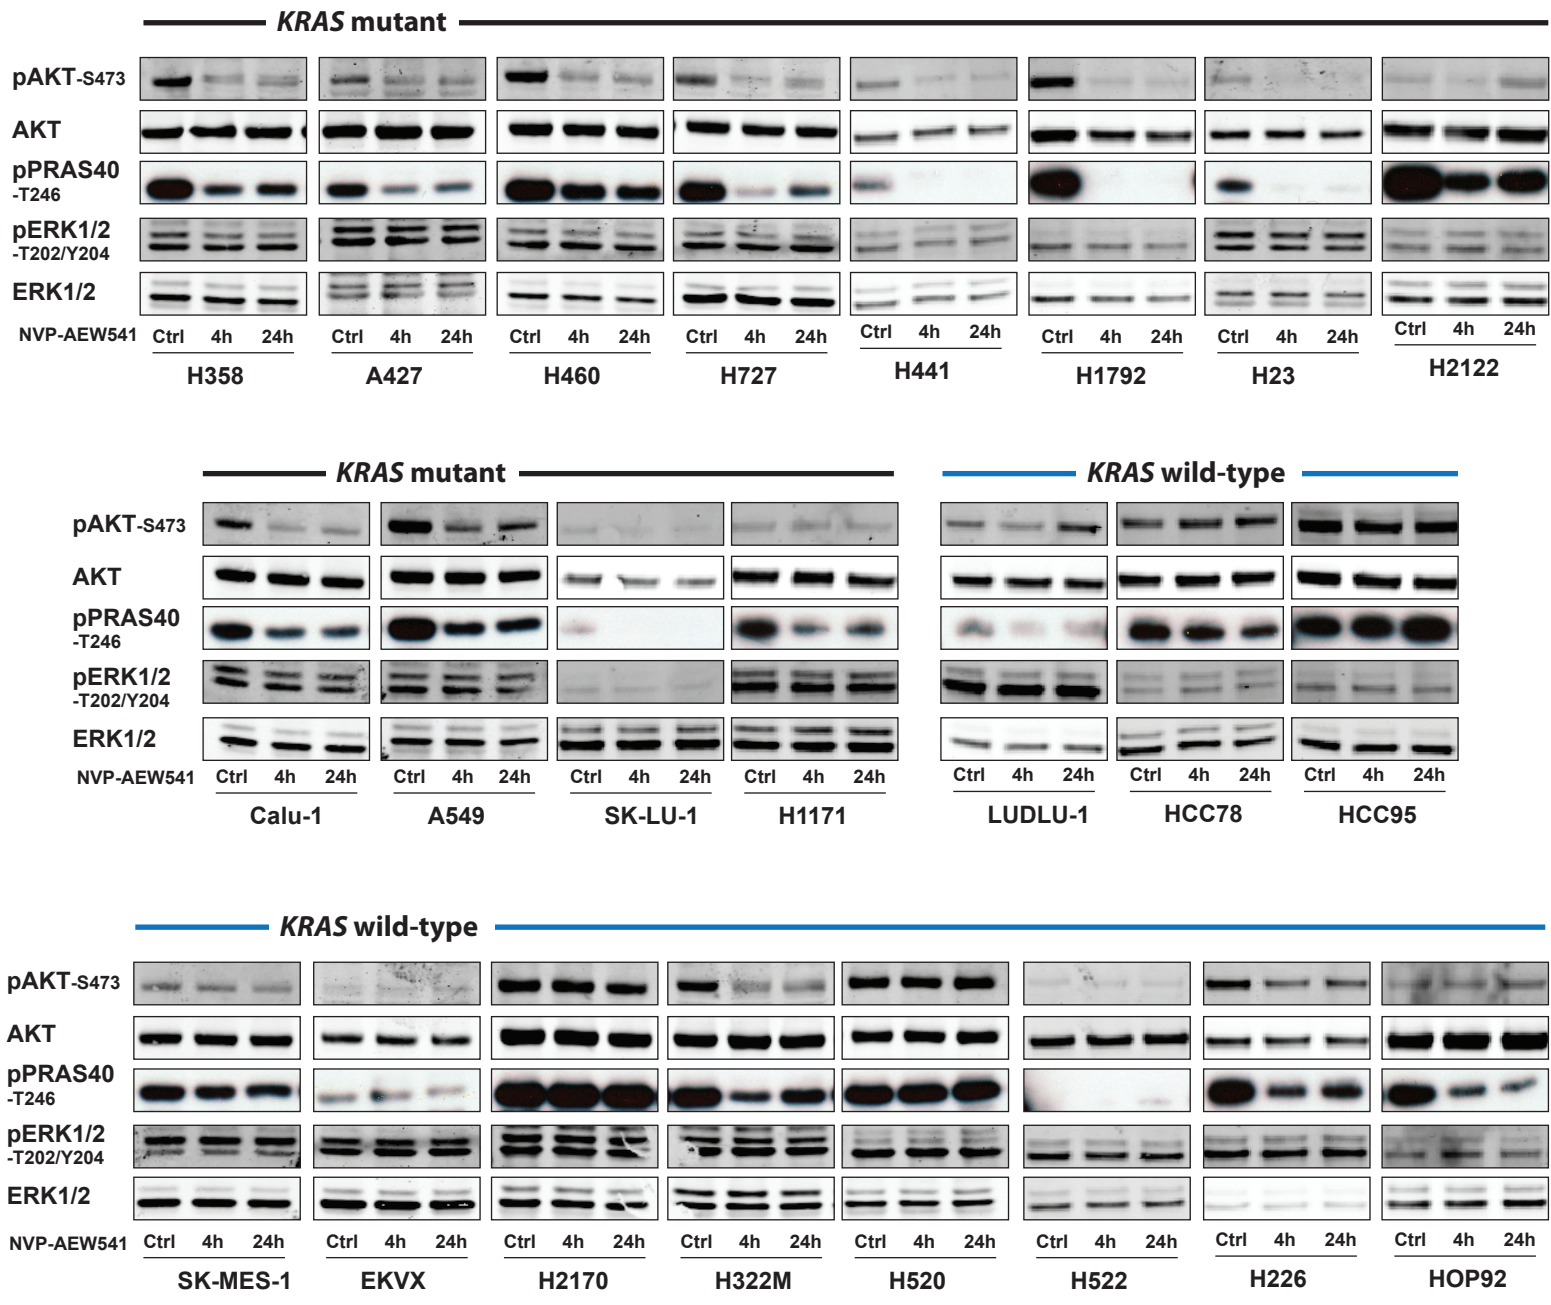

**B**

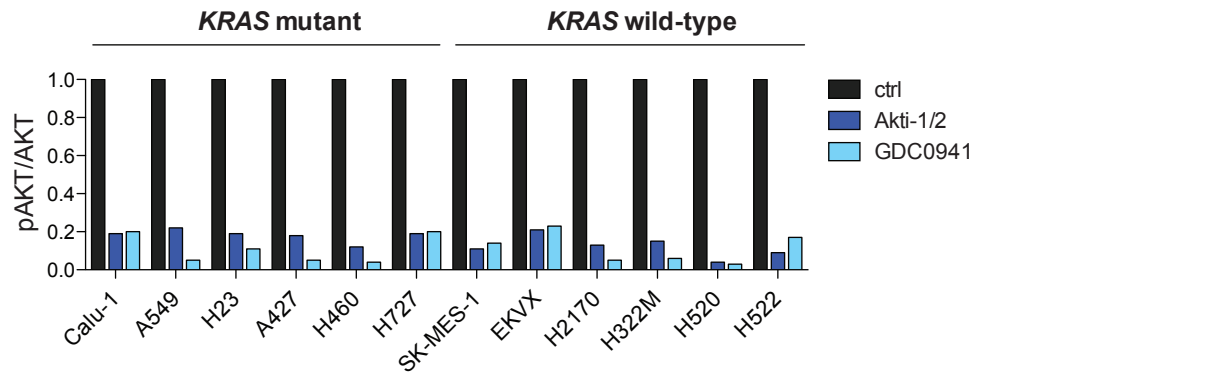

Supplement: NIHMS52197-supplement-6.pdf [file NIHMS52197-supplement-6.pdf]
