# Supplementary material
Source: PubMed Central journal article supplement (PMC3650991)

# Supplementary Figure S4

Effects of combining MEK and IGF1R inhibitors on signal transduction pathways in NSCLC cell lines

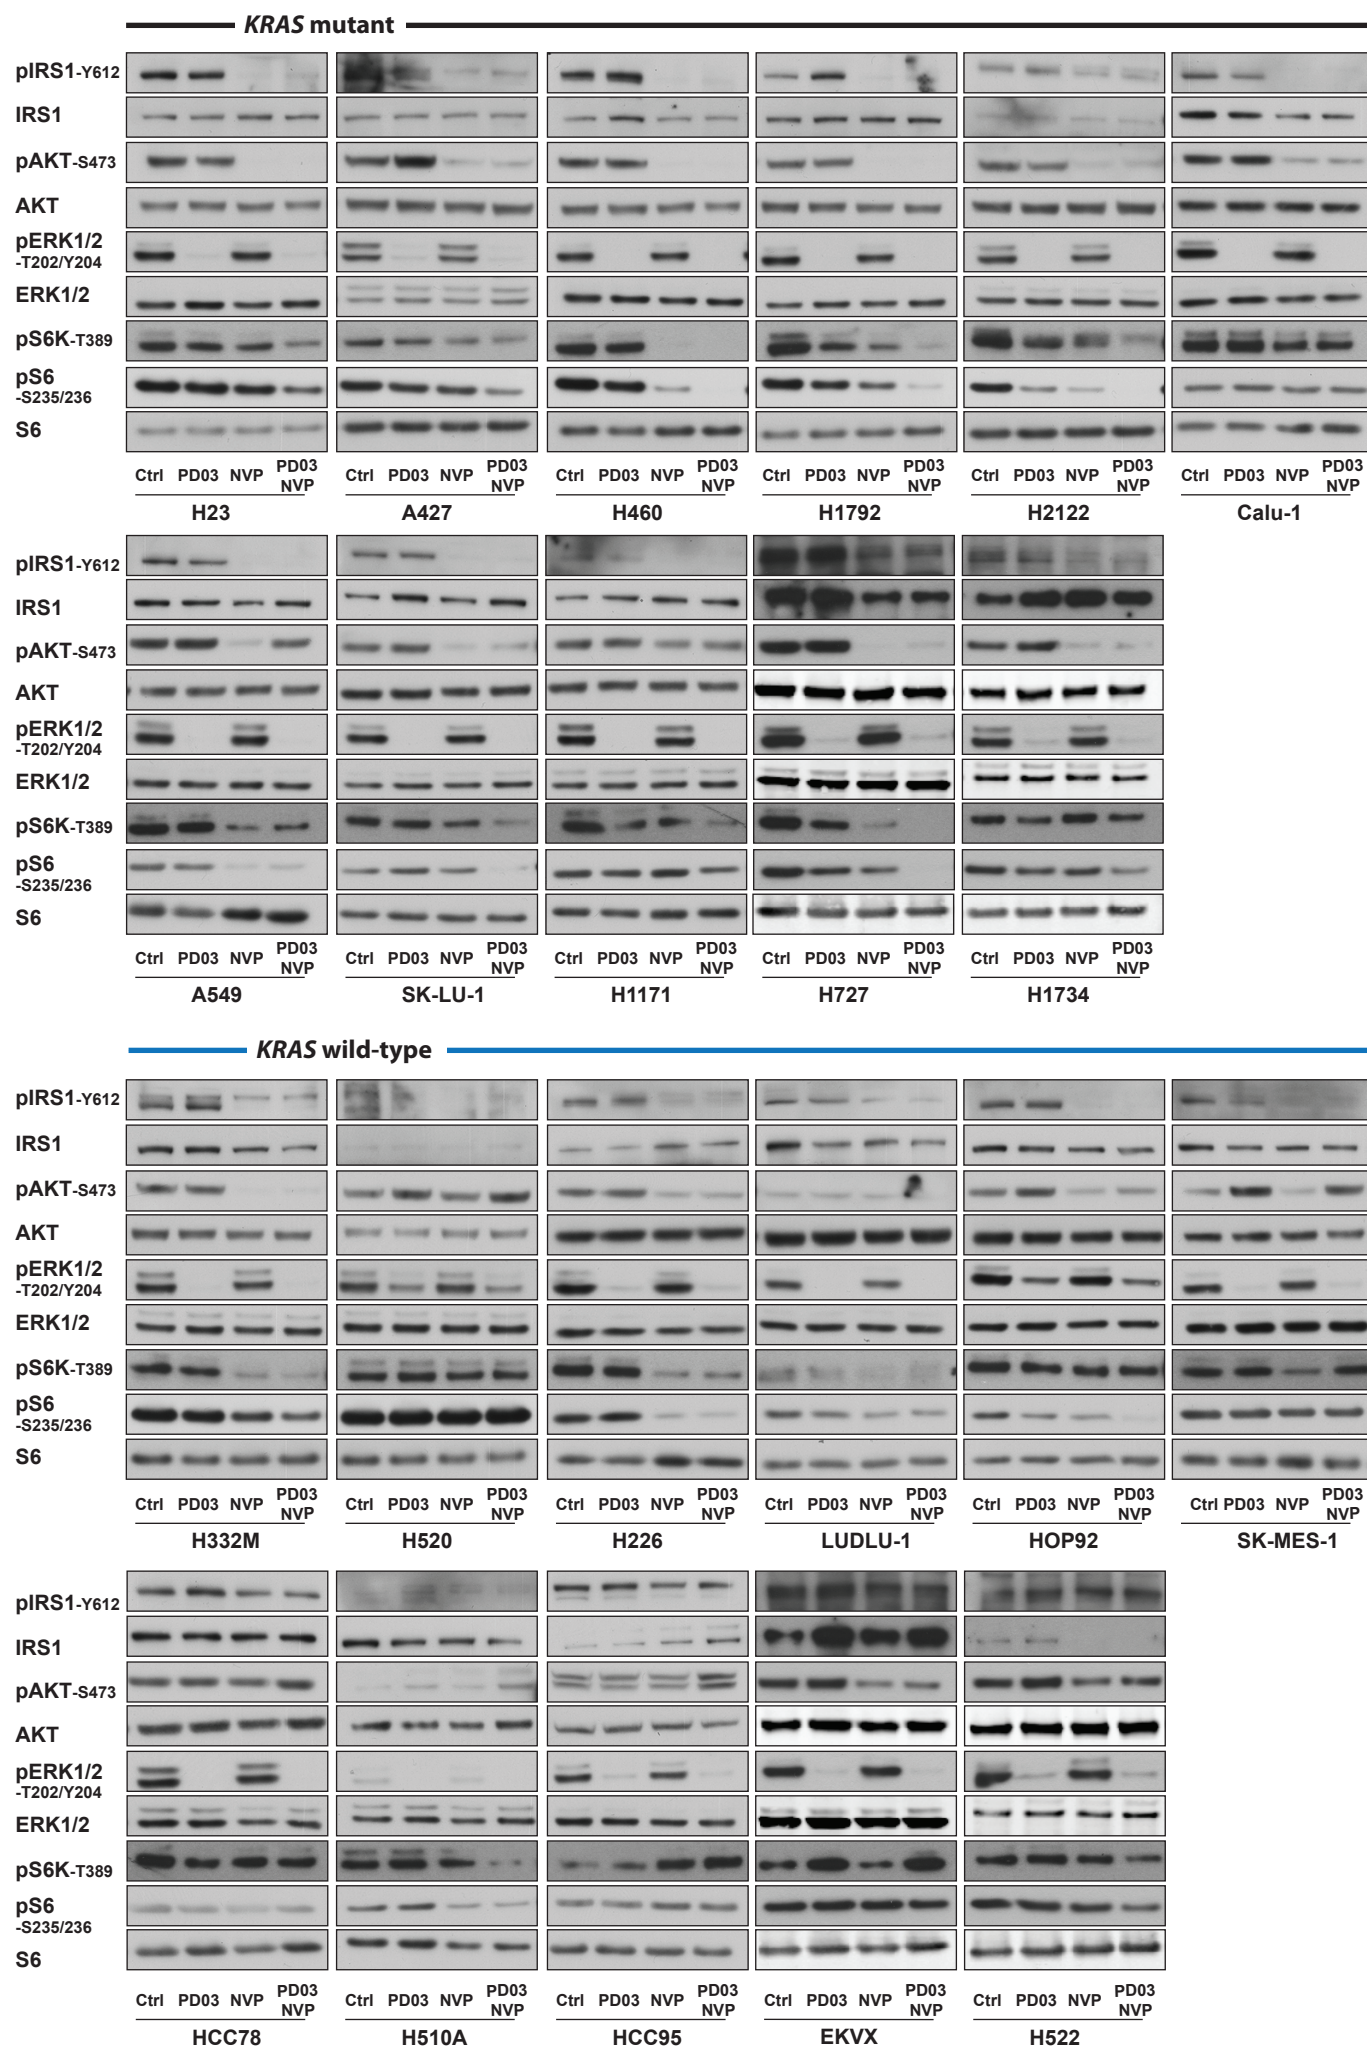

Supplement: NIHMS52197-supplement-7.pdf [file NIHMS52197-supplement-7.pdf]
