# Supplementary material
Source: PubMed Central journal article supplement (PMC3650991)

# Supplementary Figure S5

Effects of combining MEK and IGF1R inhibitors on cell viability and apoptosis in NSCLC cell lines

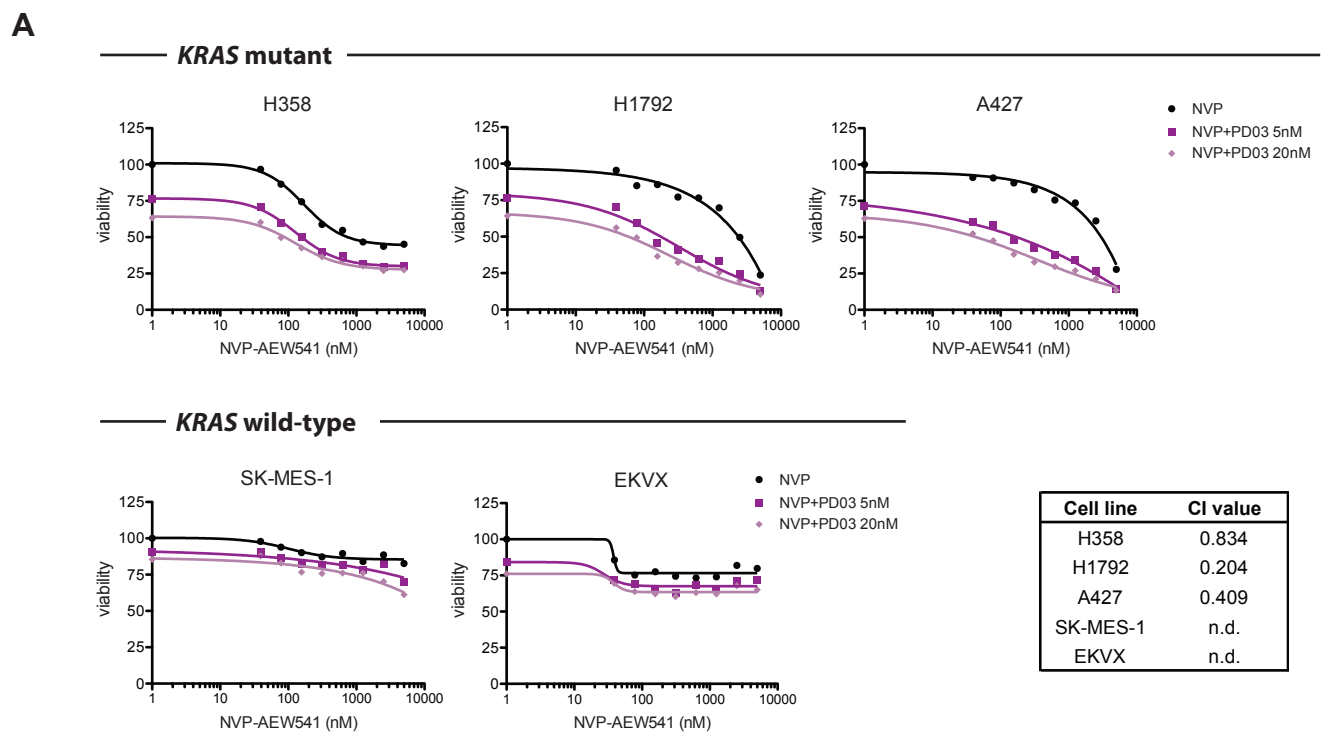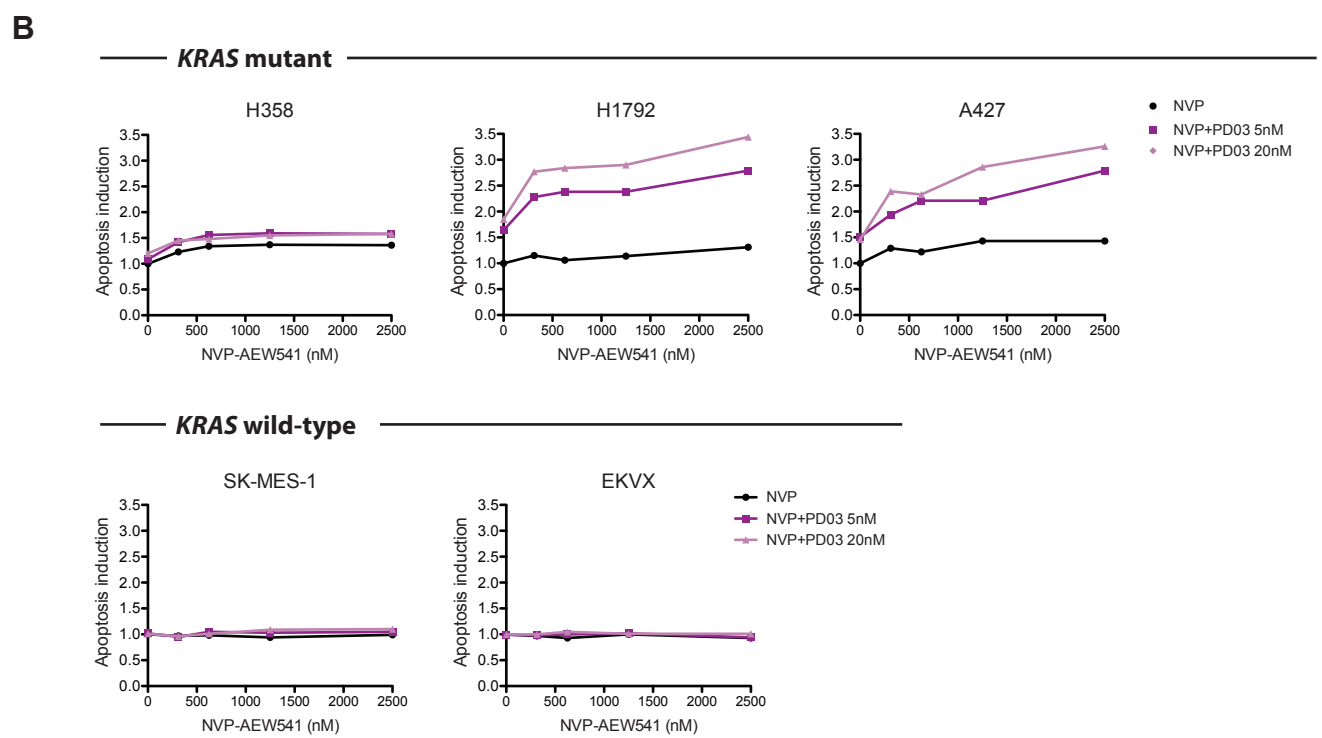

Supplement: NIHMS52197-supplement-8.pdf [file NIHMS52197-supplement-8.pdf]
