# Supplementary material
Source: PubMed Central journal article supplement (PMC3650991)

## Supplementary Figure S7

Indicators of IGF1R and INSR depletion in NSCLC cell lines and of combination drug treatment in KRAS-LA2-G12D mice

A

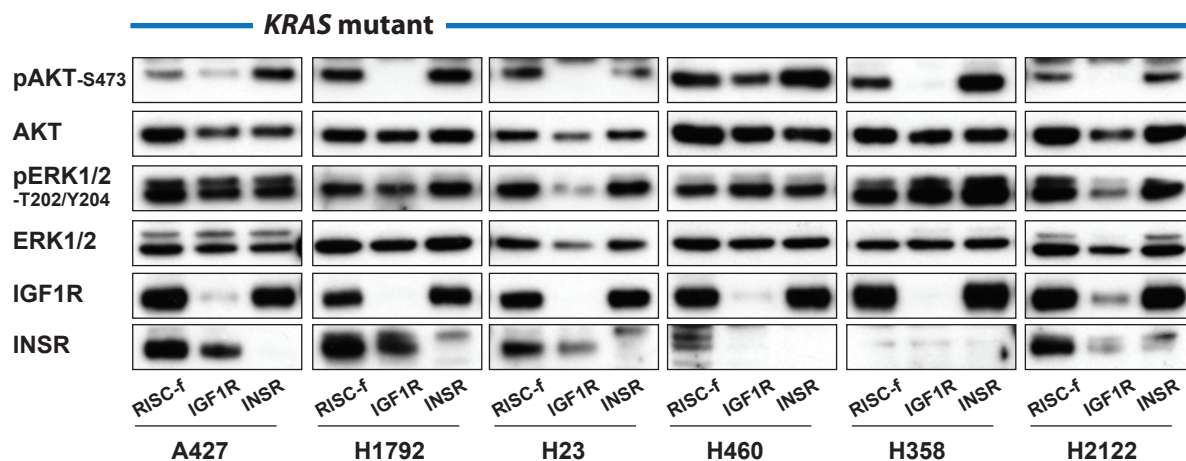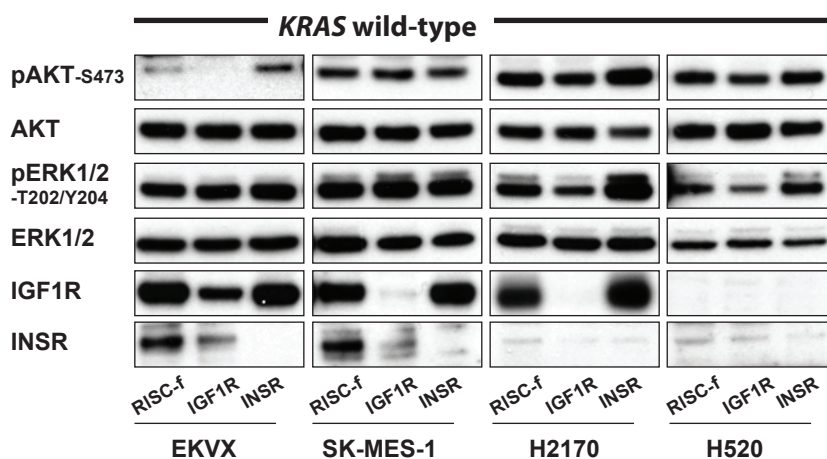

B

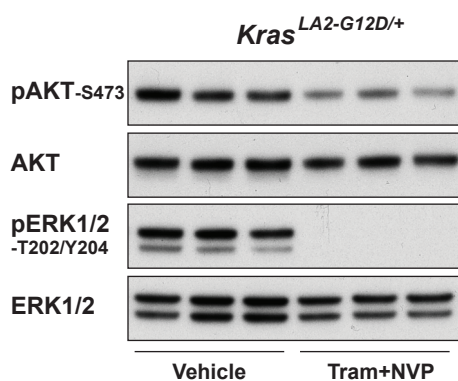

Supplement: NIHMS52197-supplement-10.pdf [file NIHMS52197-supplement-10.pdf]
