# Supplementary material
Source: PubMed Central journal article supplement (PMC3650991)
Supplement: NIHMS52197-supplement-11.pdf [file NIHMS52197-supplement-11.pdf]

# Supplementary Figure S8

Indicators of IGF1R pathway in NSCLC cell lines

**A**

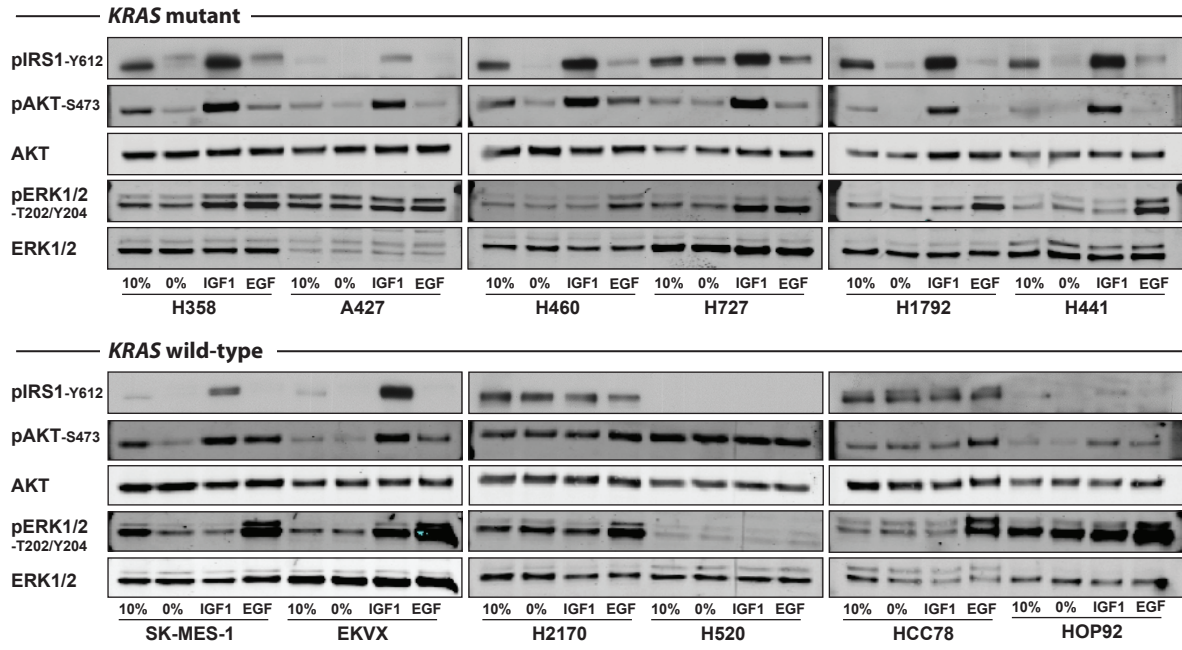

**B**

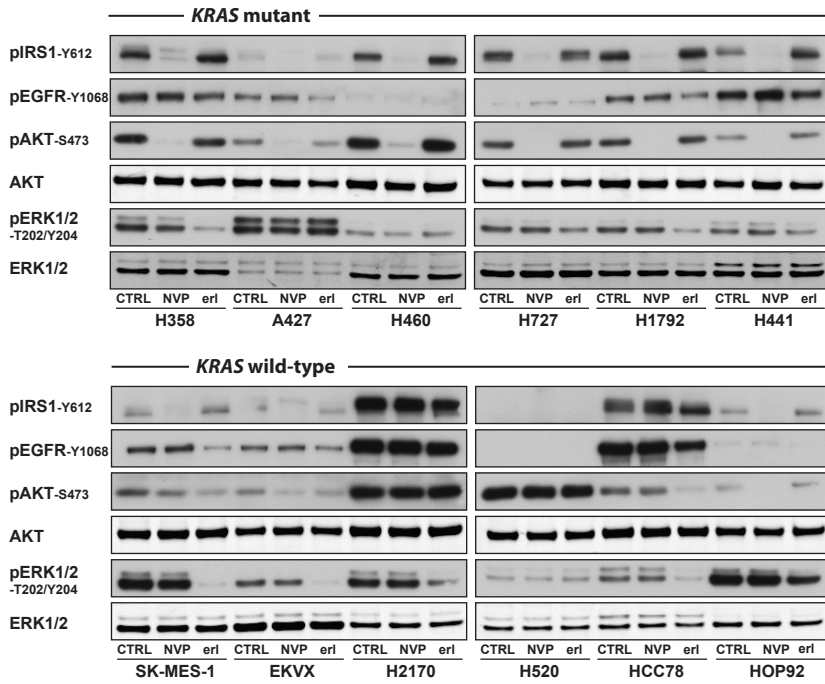

**C**

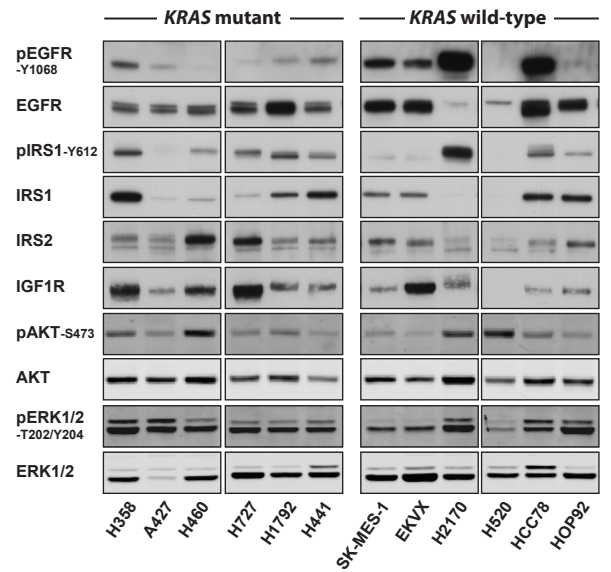

**D**

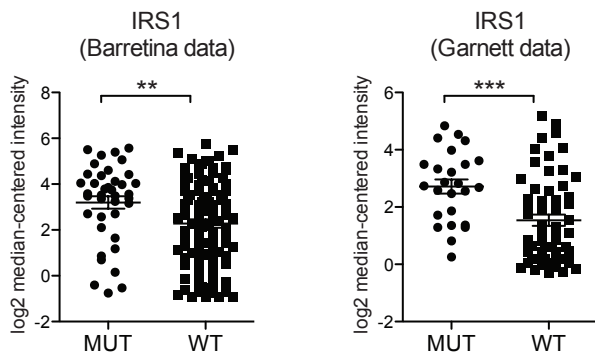

**E**

| probe set          | Cell lines    |               | tumors        |
|--------------------|---------------|---------------|---------------|
|                    | Barretina     | Garnett       | Bild          |
| IGF1R / 203627_at  | <b>0.0276</b> | 0.0642        | <b>0.0364</b> |
| IGF1R / 225330_at  | 0.257         | nd            | <b>0.0223</b> |
| IGF1R / 243358_at  | 0.1107        | nd            | 0.5623        |
| IRS1 / 204686_at   | <b>0.0049</b> | <b>0.0007</b> | 0.4789        |
| IRS2 / 209184_s_at | 0.1647        | 0.6731        | <b>0.0056</b> |
| IRS2 / 209185_s_at | 0.4988        | 0.9565        | <b>0.011</b>  |
