# Supplementary material
Source: PubMed Central journal article supplement (PMC3650991)

# Supplementary Figure S9

KRAS is required for both MEK/ERK and PI3K/AKT signaling in KRAS mutant NSCLC cells

**A**

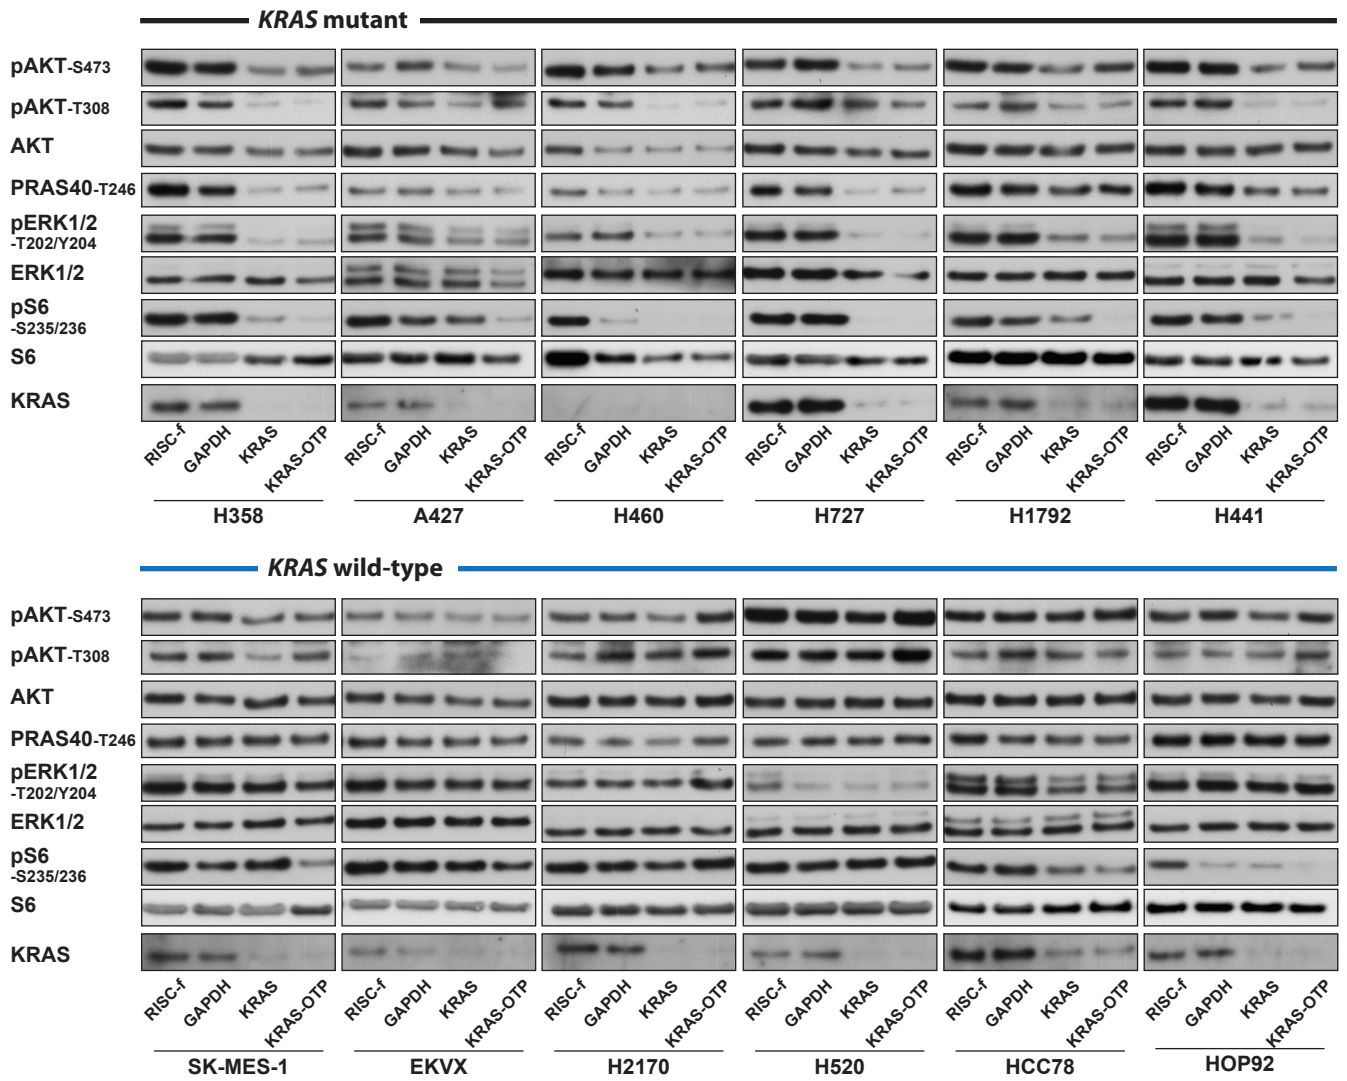

**B**

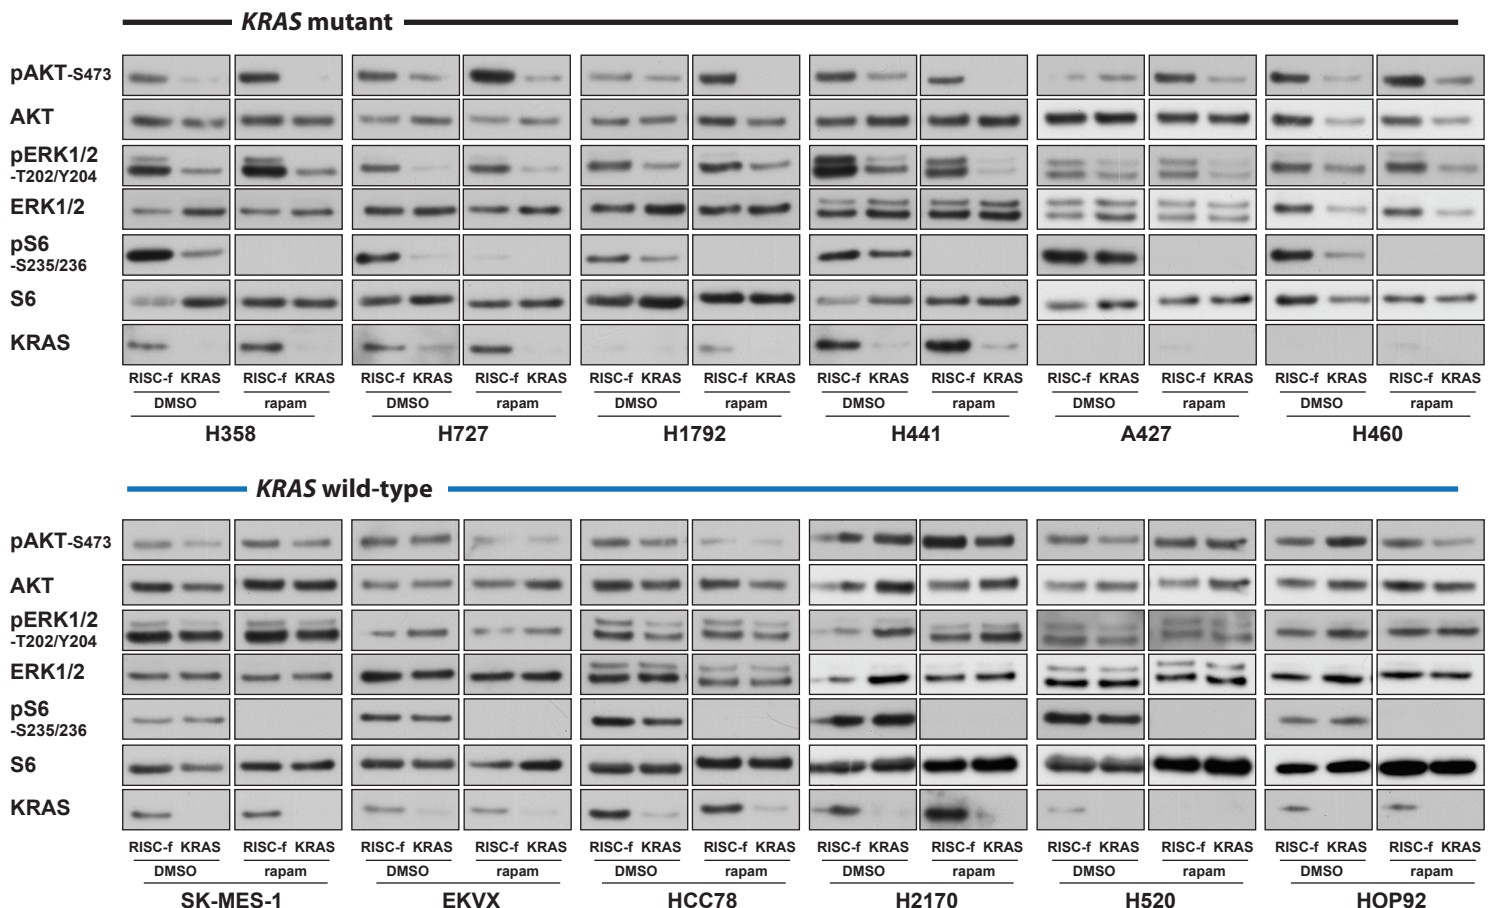

Supplement: NIHMS52197-supplement-12.pdf [file NIHMS52197-supplement-12.pdf]
