# Supplementary material
Source: PubMed Central journal article supplement (PMC3650991)

# Supplementary Figure S10

Acute oncogenic RAS signaling in MCF10A epithelial cells

**A**

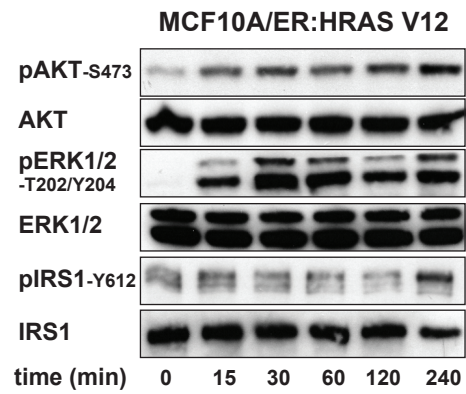

**B**

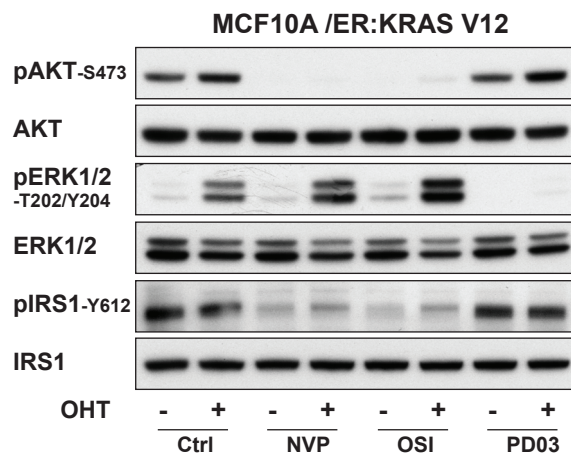

Supplement: NIHMS52197-supplement-13.pdf [file NIHMS52197-supplement-13.pdf]

# Supplementary Figure S1

## Single agent drug effects in NSCLC cell lines

**A**

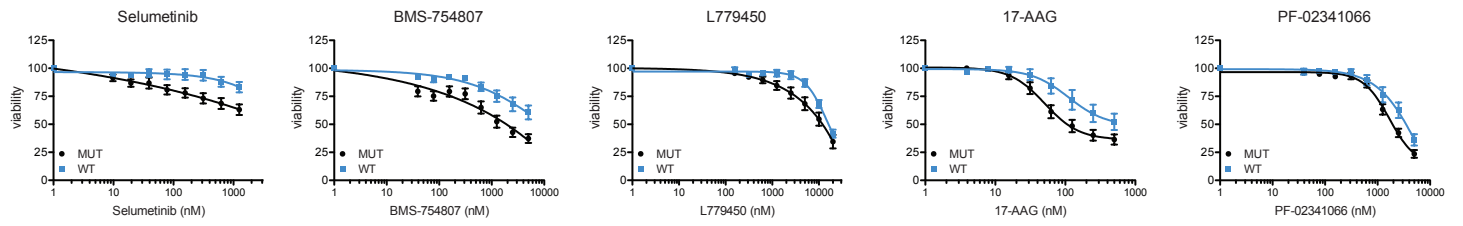

**B**

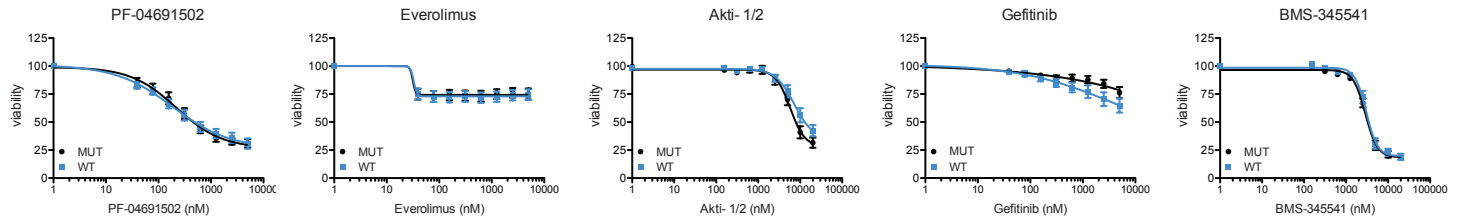

**C**

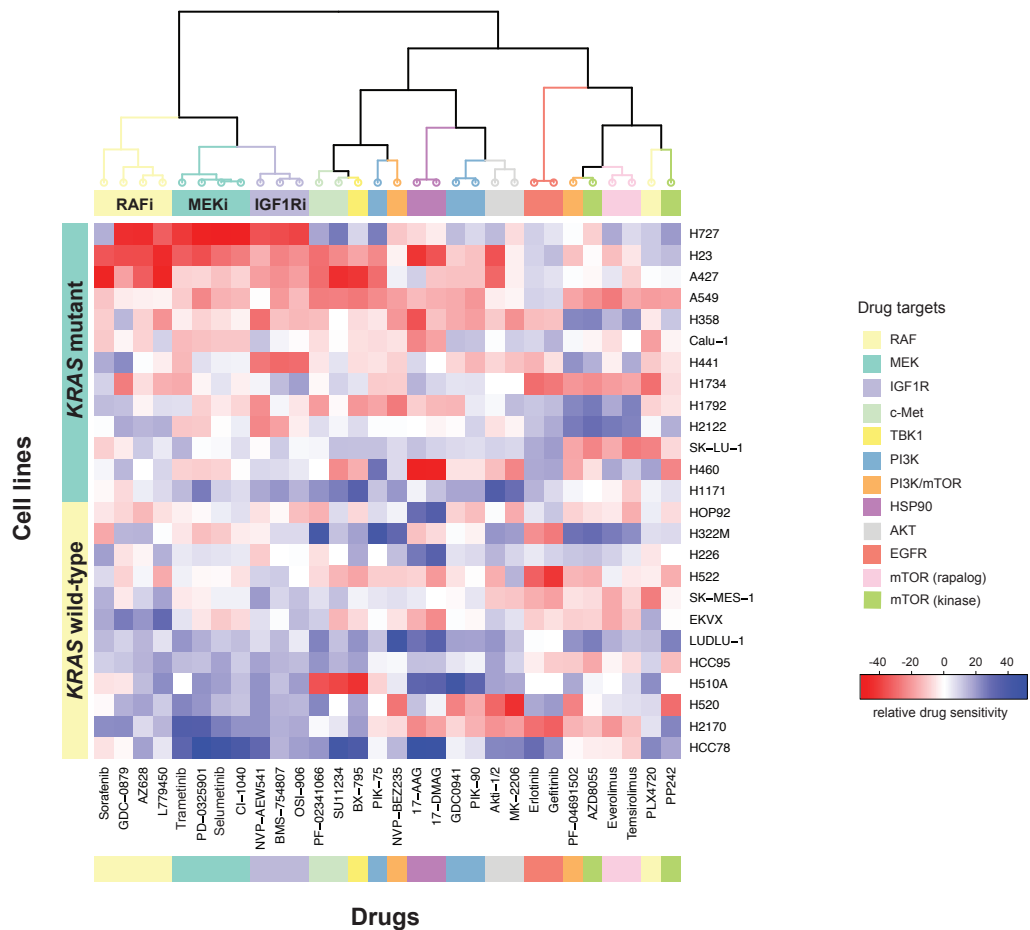

Supplement: NIHMS52197-supplement-4.pdf [file NIHMS52197-supplement-4.pdf]

# Supplementary Figure S6

## Drug combinations across the NSCLC cell line panel

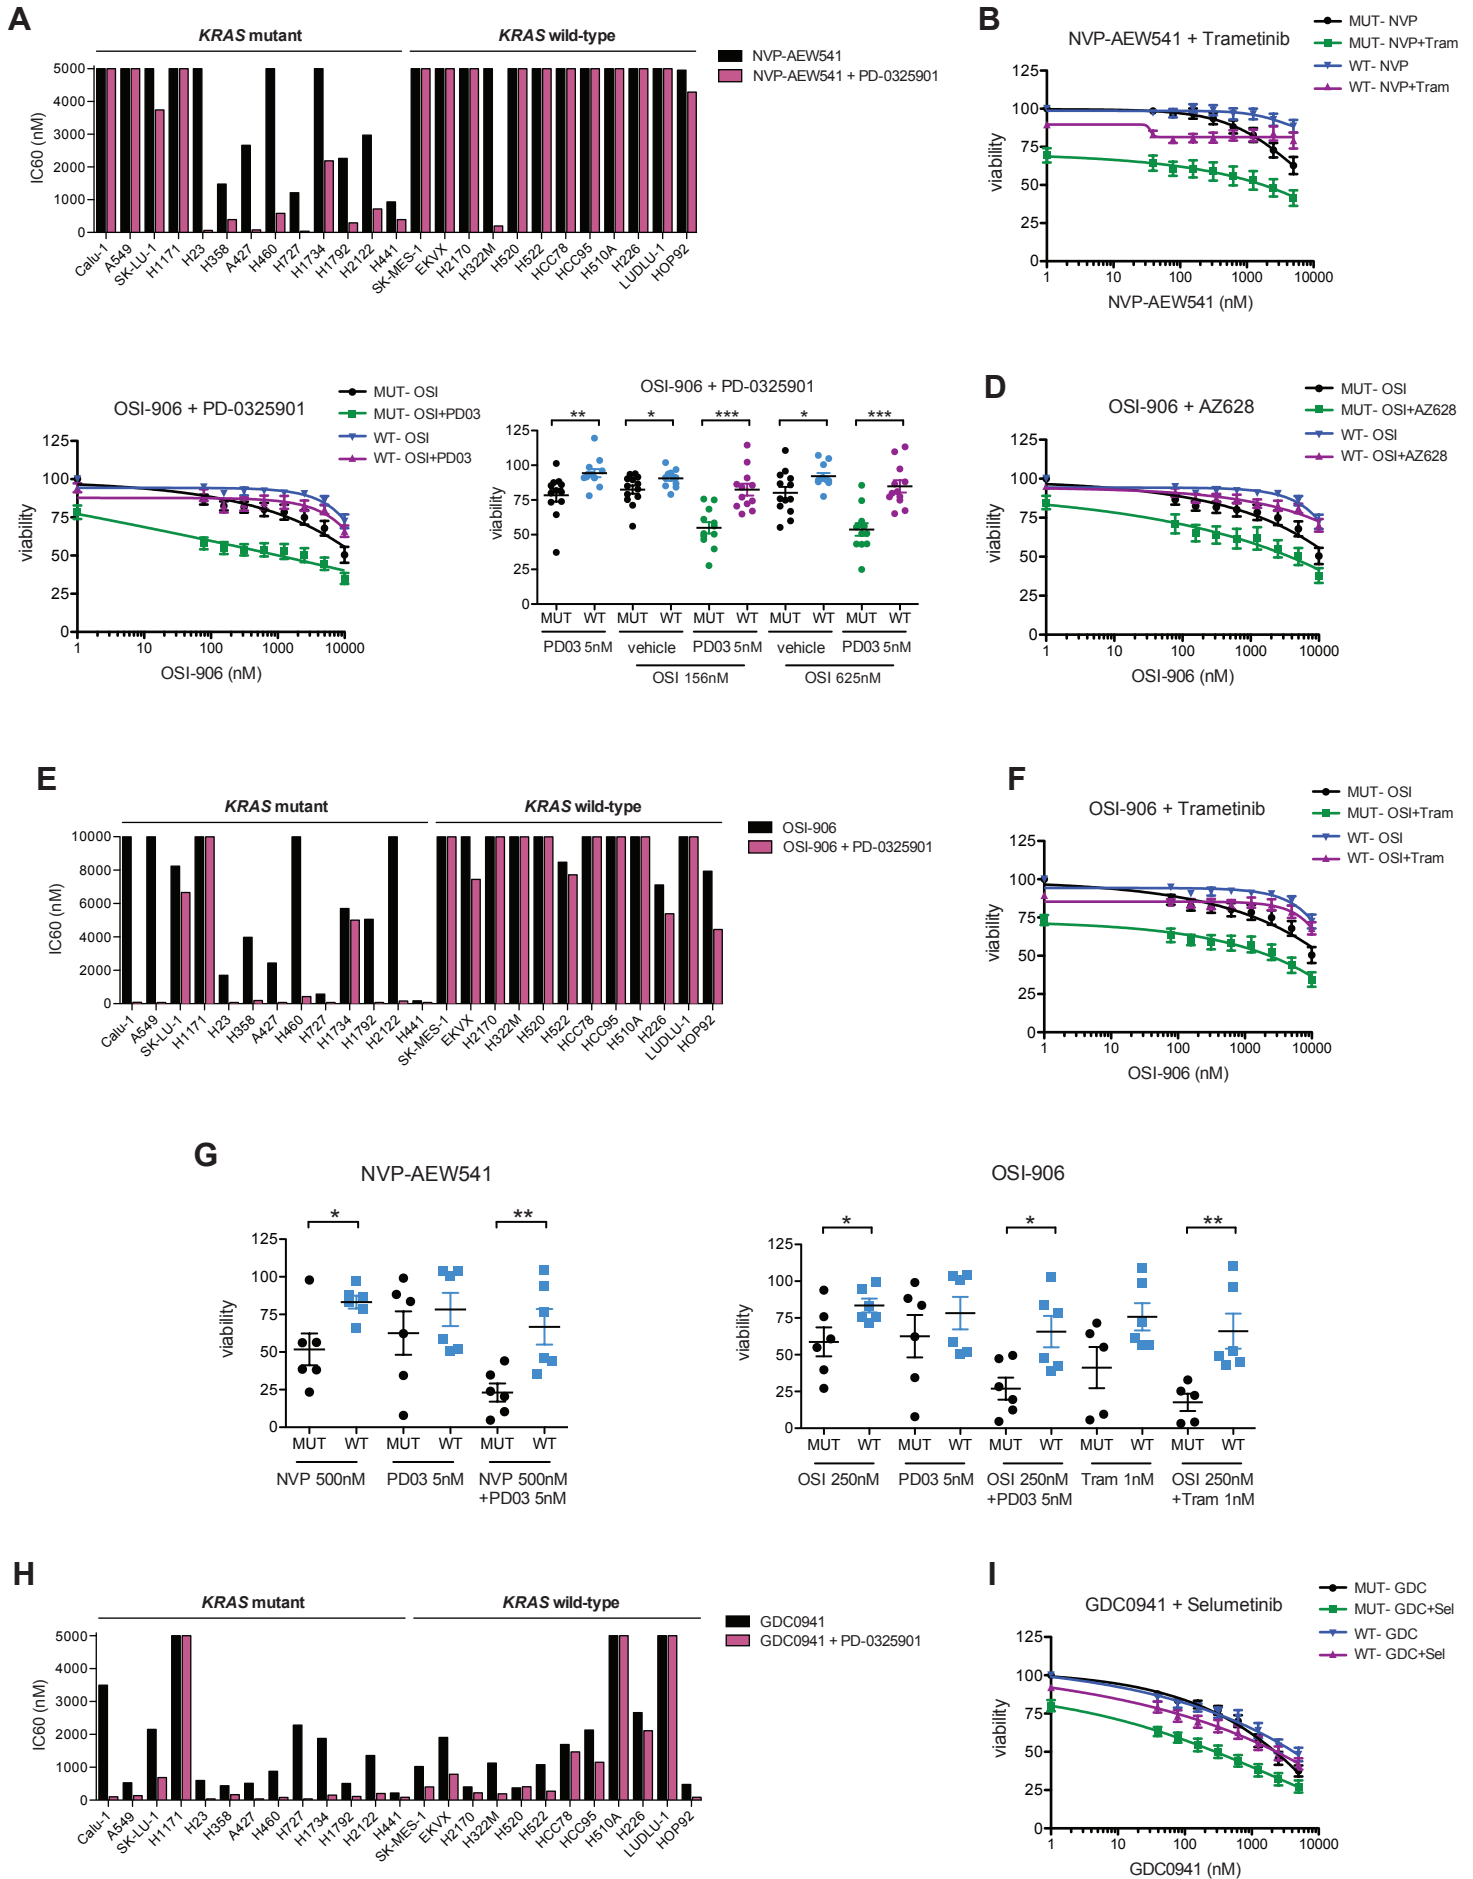

Supplement: NIHMS52197-supplement-9.pdf [file NIHMS52197-supplement-9.pdf]
